# Supplementary material for: A simple strategy to achieve shape control of Au-Cu2−xS colloidal heterostructured nanocrystals and their preliminary use in organic photovoltaics
Source: Royal Society of Chemistry journal article supplement (doi:10.1039/c8nr03928c), 2018-01-01
Supplement: c8nr03928c1.pdf [file c8nr03928c1.pdf]

## Supporting information

### **A Simple Strategy to Achieve Shape-Control of Au-Cu<sub>2-x</sub>S Colloidal Heterostructured Nanocrystals and Their Preliminary Use in Organic Photovoltaics**

Huan Wang<sup>a</sup>, Shouli Ming<sup>a</sup>, Liren Zhang<sup>a</sup>, Xin Li<sup>a</sup>, Wenhua Li<sup>\*,a</sup> and Zhishan Bo<sup>\*,a</sup>

<sup>a</sup> Beijing Key Laboratory of Energy Conversion and Storage Materials, College of Chemistry, Beijing Normal University, Beijing 100875, P. R. China

\*e-mail: 11112013119@bnu.edu.cn (Wh.L.)    zsbo@bnu.edu.cn (Zs.B.)

### **Experiments**

Materials: Chloroauric acid (HAuCl<sub>4</sub>·3H<sub>2</sub>O, 99.95%), sodium borohydride (NaBH<sub>4</sub>) were purchased from Beijing Ouhe Technique Company. CuCl<sub>2</sub>·2H<sub>2</sub>O (99.99%), 1-dodecanethiol (DDT, 98%), di-*tert*-butyl disulfide (TBDS, 97%), didodecyltrimethylammonium bromide (DDAB, 98%) were all purchased from Aldrich. Ethanol, isopropanol, chloroform, toluene and oleylamine (OLA) were of analytical grade and obtained from various sources.

Synthesis of Au NCs: The Au nanocrystals were synthesized following a reported protocol with slight modifications. In a typical synthesis, a solution comprising ~4 mg/mL HAuCl<sub>4</sub>·3H<sub>2</sub>O and ~10 mg/mL DDAB in toluene was sonicated for at least 30 min to form a clear dark red solution. Then 100 µL of 9.4 M NaBH<sub>4</sub> aqueous solution was introduced into the solution (10 mL) under vigorous stirring. After 15 minutes, 0.8 mL of DDT was injected and the solution was stirred for another 5 minutes (Figure S1).

Device fabrication: Photovoltaic devices based on P1:PC<sub>71</sub>BM with different Au-Cu<sub>2-x</sub>S NCs concentrations are fabricated. The device configuration is ITO/PEDOT:PSS/P1:PC<sub>71</sub>BM:Au-Cu<sub>2-x</sub>S NCs/LiF/Al (Figure S8(b)). ITO (20 Ω) glass was cleaned with detergent, acetone and isopropyl alcohol under ultrasonication. PEDOT:PSS (Baytron AI

4083 from H.C. Starck) was filtered with a 0.45  $\mu\text{m}$  polyvinylidene difluoride (PVDF) film before use. A PEDOT:PSS thin layer was spin-coated on top of the ITO substrates at 3500 rpm/s for 30 s and dried subsequently at 150  $^{\circ}\text{C}$  for 15 min on a hotplate. Au-Cu<sub>2-x</sub>S solution of 1.000 mg/mL was prepared in 1,2-dichlorobenzene (ODCB) and then diluted to 0.50 mg/mL, 0.10 mg/mL, 0.05 mg/mL and 0.01 mg/mL, respectively. Then five sets of ODCB solutions of P1 and PC<sub>71</sub>BM (P1: PC<sub>71</sub>BM = 1:2, 20 mg/mL) with 0 mg/mL, 0.50 mg/mL, 0.10 mg/mL, 0.05 mg/mL and 0.01 mg/mL Au-Cu<sub>2-x</sub>S NCs were spin-coated onto the PEDOT:PSS layer at 1000 rpm to form the active layer. Finally, LiF (0.6 nm) and Al (100 nm) were sequentially evaporated under high vacuum onto the active layer as a cathode.

**Measurements and instruments:** The scanning electron microscope (SEM) were recorded with a field-emission scanning electron microscope (S-4800) operated at an accelerating voltage of 10 kV to 20 kV. The nanocrystal morphology and energy-dispersive X-ray spectroscopy (EDX) elemental mapping were further characterized by high-resolution transmission electron microscopy (TEM, Tecnai F20, FEI) with an accelerating voltage of 200 kV. Ultraviolet-visible (UV-vis) absorption spectra were measured on a PerkinElmer UV-vis spectrometer. X-Ray powder diffraction (XRD) was carried out on an X-ray diffractometer (PANalytical X' Pert PRO MPD) with Cu KR radiation. The current density-voltage ( $J$ - $V$ ) performances of the devices were measured on a computer-controlled Keithley 236 Source Measure Unit. The white light source we used is an Air Mass AM 1.5G AAA class solar simulator (model XES-301S, SAN-EI) solar simulator with an irradiation intensity of 100 mW/cm<sup>2</sup> and our light

intensity

was calibrated with a standard single-crystal Si photovoltaic cell before employment. The surface morphology and roughness analysis of active layer were performed by atomic force microscopy (AFM) with a Digital Instrument Multimode Nanoscope IIIA under ambient conditions operating in the tapping mode. The external quantum efficiency (EQE) of the device was measured with a 150 W xenon lamp (CTTH-150W) and a monochromator (M24-S).

### Characterizations

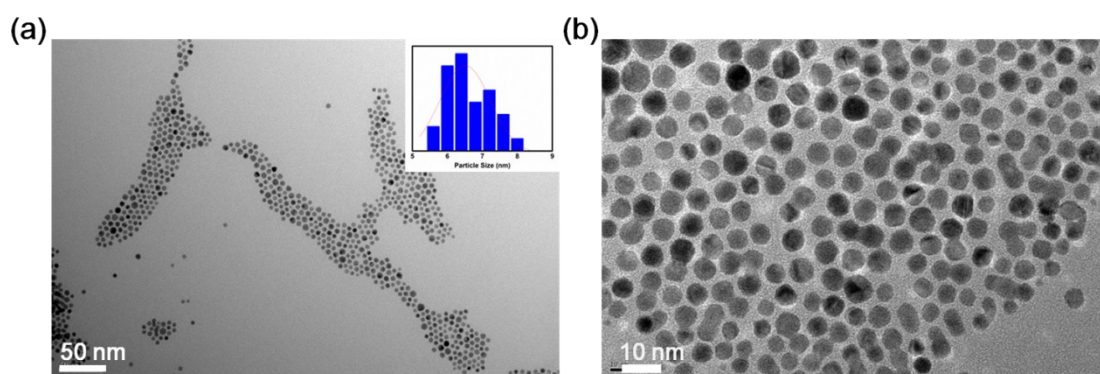

**Figure S1.** (a-b) TEM micrographs of Au nanoparticles. The inset image is particle size contribution of Au nanoparticles measured by randomly counting about 150 nanocrystals in the TEM image by Image Tool Software.

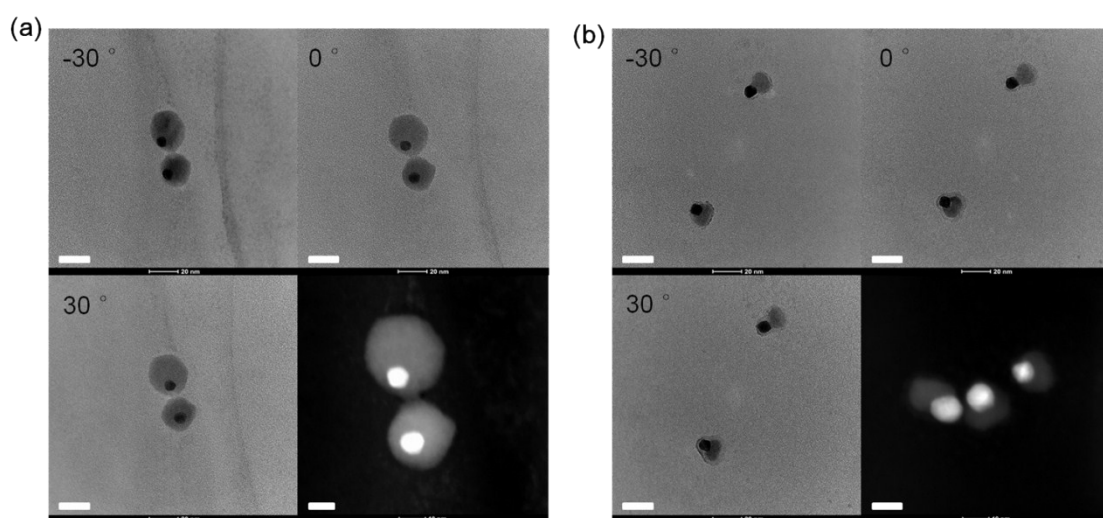

**Figure S2.** (a) TEM and STEM micrographs of Au-Cu<sub>2-x</sub>S NCs (Shape I ) at tilt angles of -30°, 0° and 30°; (b) TEM and STEM micrographs of Au-Cu<sub>2-x</sub>S NCs (Shape II ) at tilt angles of -30°, 0° and 30°. The scale bars correspond to 20 nm.

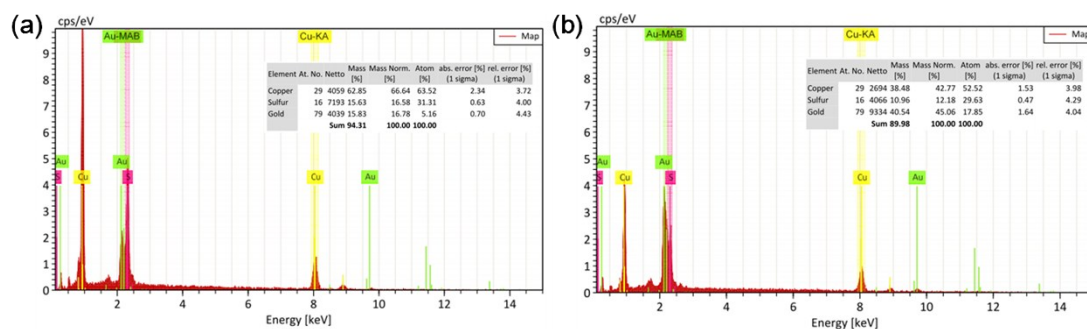

**Figure S3.** EDX spectroscopy of (a) Au-Cu<sub>2-x</sub>S (Shape I ) and (b) Au-Cu<sub>2-x</sub>S NCs (Shape II ).

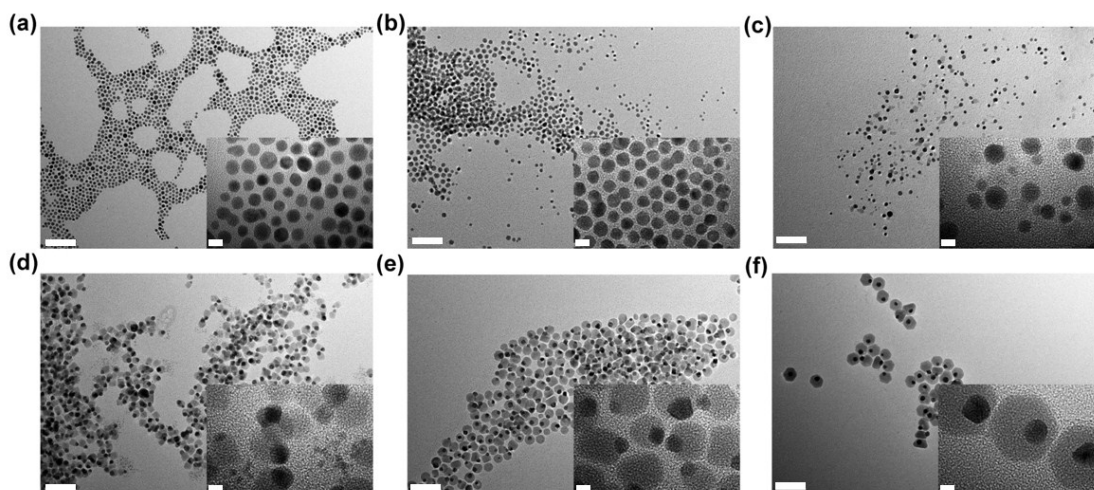

**Figure S4.** (a-f) TEM micrographs of Au-Cu<sub>2-x</sub>S NCs (Shape I ) fabricated in the different reaction time of 0, 6, 10, 30, 50 and 70 min, respectively. The scale bars correspond to 50 nm (insets correspond to 5 nm).

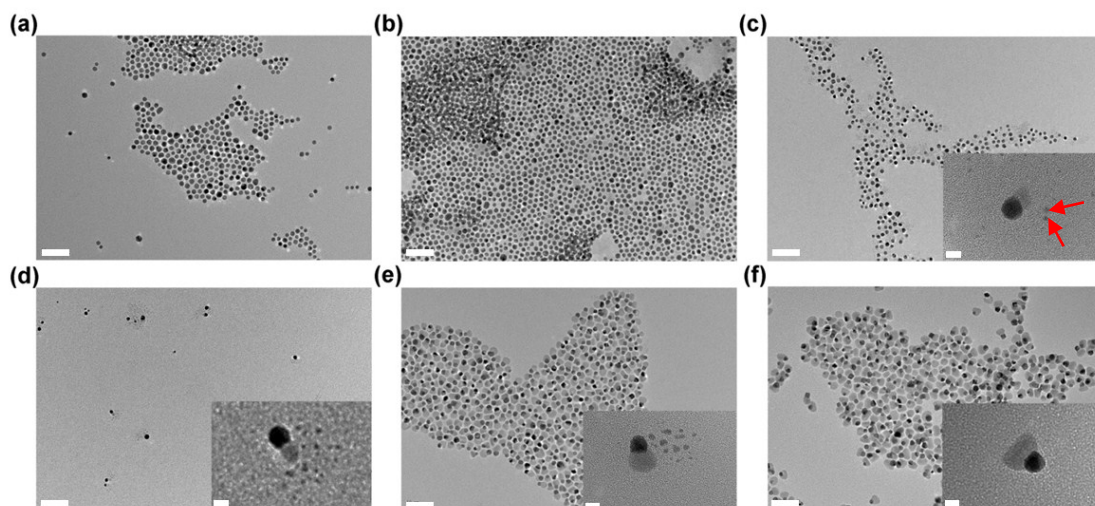

**Figure S5.** (a-f) TEM micrographs of badminton-like Au-Cu<sub>2-x</sub>S NCs (Shape II) fabricated in the different reaction time of 0, 3, 10, 30, 50 and 70 min, respectively. The scale bars correspond to 50 nm (insets correspond to 5 nm).

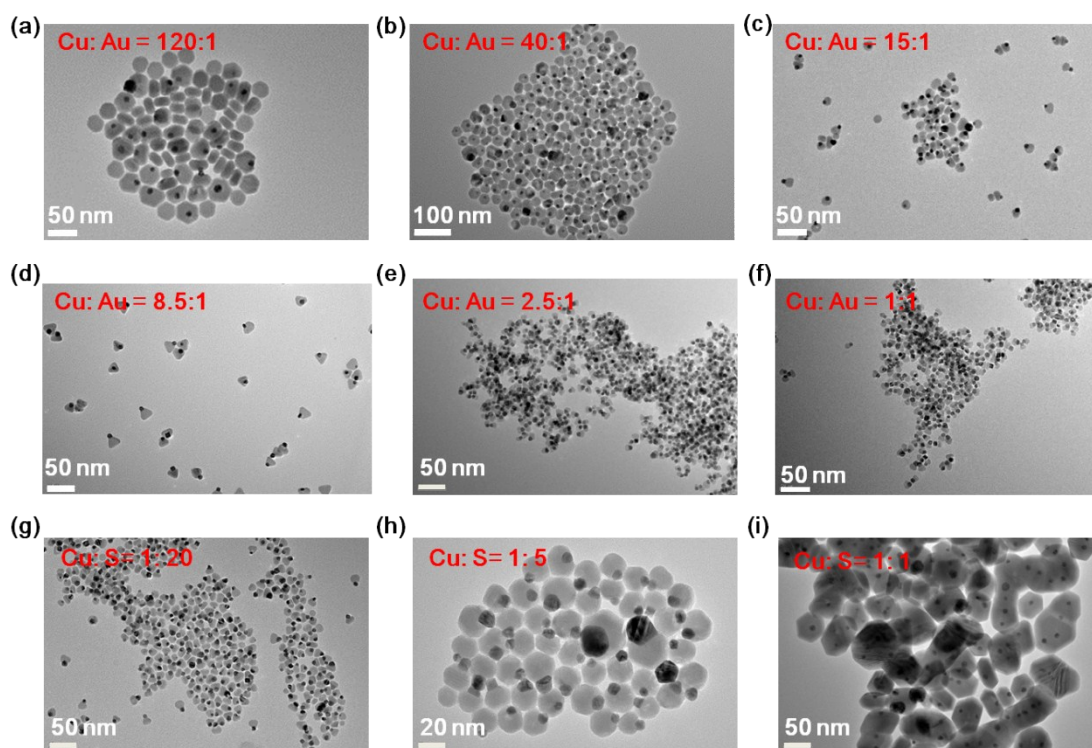

**Figure S6.** (a-i) TEM micrographs of Au-Cu<sub>2-x</sub>S NCs obtained under different molar ratio of Au: Cu.

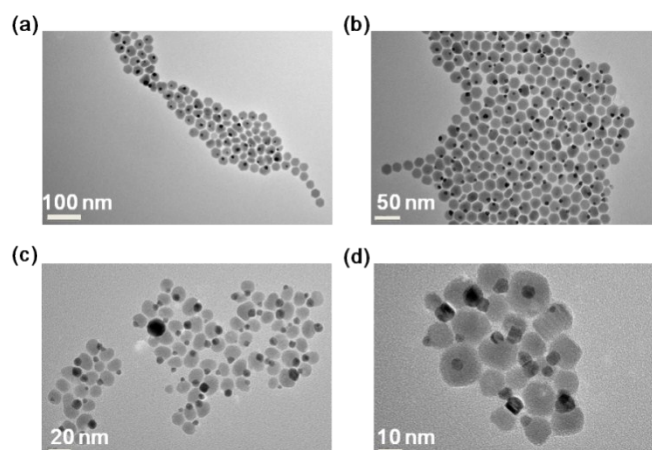

**Figure S7.** TEM micrographs of Au-Cu<sub>2-x</sub>S NCs obtained under different conditions: (a) 10 mmol of TBDS was used; (b) 1 mmol of CuCl<sub>2</sub>•2H<sub>2</sub>O, 0.05 mmol of Au NPs and 10 mmol of TBDS was used; (c) DDT (20 mmol S precursor) was used instead of TBDS; (d) 5 mL of OLA and 5 mL of OA used instead of 10 mL of OLA .

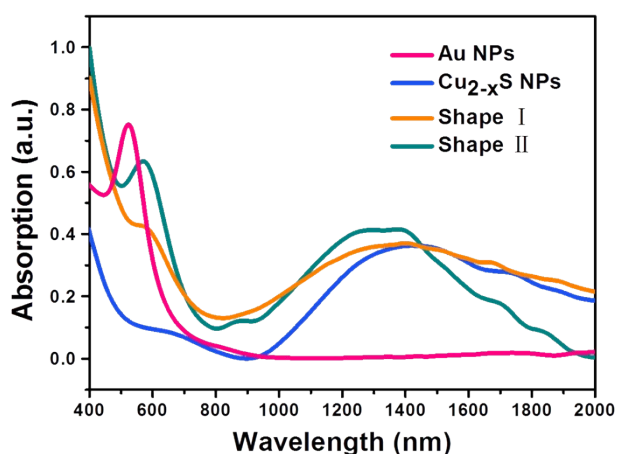

**Figure S8.** UV-vis spectra of Au, Cu<sub>2-x</sub>S and Au-Cu<sub>2-x</sub>S NCs dispersed in chloroform.

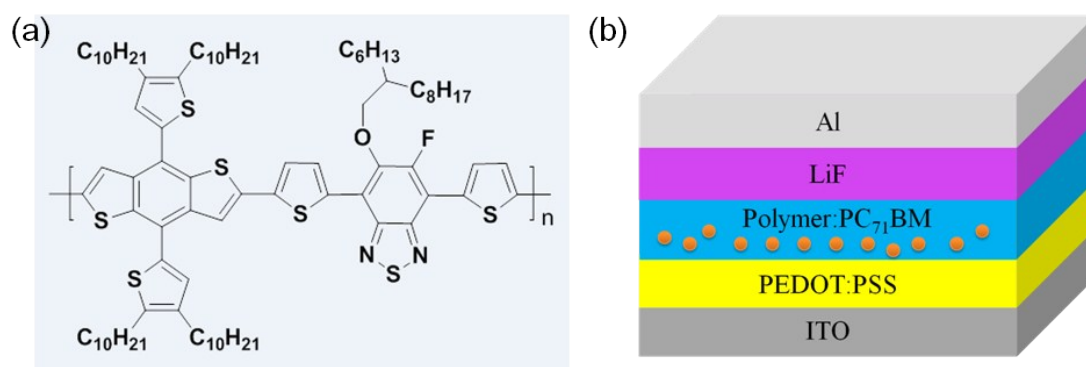

**Figure S9.** (a) Molecular structure of the polymer (P1) used in the active layer; (b)

Configuration of the photovoltaic device.

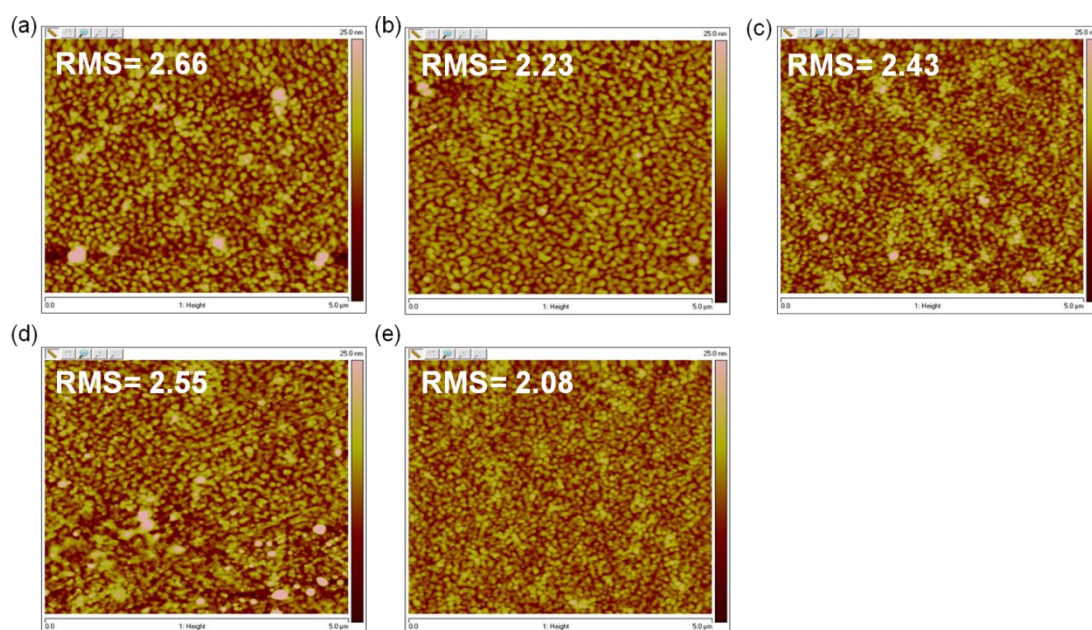

**Figure S10.** AFM height images for ITO/PEDOT: PSS/ P1: PC<sub>71</sub>BM films (a) 0 mg/mL; (b) 0.50 mg/mL; (c) 0.10 mg/mL; (d) 0.05 mg/mL and (e) 0.01 mg/mL Au-Cu<sub>2-x</sub>S NCs. The corresponding mean roughnesses (RMS) of the films are 2.66 nm, 2.23 nm, 2.43 nm, 2.55 nm and 2.08 nm, respectively.
